# Supplementary material for: MetAP-like Ebp1 occupies the human ribosomal tunnel exit and recruits flexible rRNA expansion segments
Source: PubMed Central journal article supplement (PMC7005732; doi:10.1038/s41467-020-14603-7), 2020-02-07
Supplement: 41467_2020_14603_MOESM2_ESM.pdf [file 41467_2020_14603_MOESM2_ESM.pdf]

## Description of Additional Supplementary Files

File Name: Supplementary Movie 1

Description: Conformational plasticity of ES27L-B in its exit position. The movie shows a morph between three different cryo-EM reconstructions based on 3D classifications focused on ES27L. The view is as in Fig. 1c top panel rotated 90° counter clockwise.

File Name: Supplementary Movie 2

Description: Conformational plasticity of H59 upon Ebp1-binding. The movie shows a morph between H59 in its locked-position (ribosome without Ebp1, PDB ID 6EK0) and in its docked-position in the Ebp1-ribosome complex. H59 serves as dynamic adaptor with a metazoan-specific bulged-out guanine nucleotide (G2711, red) moving about 10 Å from H53 (locked) to the Ebp1 insert domain (docked). The nucleotides of the H59-closing tetraloop are labelled and shown in colour. View is the same as in Fig. 1c bottom panel.
